# Supplementary material
Source: PubMed Central journal article supplement (PMC9525607)
Supplement: 41418_2022_992_MOESM3_ESM.pdf [file 41418_2022_992_MOESM3_ESM.pdf]

**Important information. Please read.**

- This form should be used by authors to request any change in authorship (adding/deleting authors) including changes in corresponding authors. This form should not be used for name changes. Please fully complete all sections. Use black ink and block capitals and provide each author's full name with the given name first followed by the family name.
- By signing this declaration, all authors guarantee that the order of the authors are in accordance with their scientific contribution, if applicable as different conventions apply per discipline, and that only authors have been added who made a meaningful contribution to the work.
- Please note, in author collaborations where there is formal agreement for representing the collaboration, it is sufficient for the representative or legal guarantor (usually the corresponding author) to complete and sign the Authorship Change Form on behalf of all authors, **next to the added/removed author(s). (Complete Section 3, followed by Section 6.)**  
In author collaborations where there is no formal agreement for representing the collaboration and **there are more than 10 authors**, one may sign for all, provided the signer appends correspondence that attests that each of the authors have agreed to the change **and the added/removed authors sign the form. (Complete Section 3, followed by Section 6.)**
- Please note, we cannot investigate or mediate any authorship disputes. If you are unable to obtain agreement from all authors (including those who you wish to be removed) you must refer the matter to your institution(s) for investigation. Please inform us if you need to do this.
- If you are not able to return a fully completed form within **30 days** of the date that it was sent to the author requesting the change, we may have to withdraw your manuscript. We cannot publish manuscripts where authorship has not been agreed by all authors (including those who have been removed).
- Incomplete forms will be rejected.
- Please return/upload this form, fully completed, to the Journals Editorial Office. The Journal and/or Publisher will consider the information you have provided to decide whether to approve the proposed change in authorship. We may decide to contact your institution for more information or undertake a further investigation, if appropriate, before making a final decision.

**Section 1: Please provide the current title of manuscript**

**Manuscript ID no.:** CDD-21-2482RR

**Title:** Ezh2 competes with p53 to license lncRNA Neat1 transcription for inflammasome activation

**Section 2: Please provide the previous authorship, in the order shown on the manuscript before the changes were introduced. Please indicate the corresponding author by adding (CA) behind the name.**

|                         | First name(s) | Family name | ORCID or SCOPUS id, if available |
|-------------------------|---------------|-------------|----------------------------------|
| 1 <sup>st</sup> author  | Jia           | Yuan        | N/A                              |
| 2 <sup>nd</sup> author  | Qingchen      | Zhu         | N/A                              |
| 3 <sup>rd</sup> author  | Xingli        | Zhang       | N/A                              |
| 4 <sup>th</sup> author  | Guiheng       | Zhang       | N/A                              |
| 5 <sup>th</sup> author  | Ni            | Li          | N/A                              |
| 6 <sup>th</sup> author  | Yifei         | Pei         | N/A                              |
| 7 <sup>th</sup> author  | Yan           | Wang        | N/A                              |
| 8 <sup>th</sup> author  | Siyu          | Pei         | N/A                              |
| 9 <sup>th</sup> author  | Jing          | Xu          | N/A                              |
| 10 <sup>th</sup> author | Pan           | Jia         | N/A                              |
| 11 <sup>th</sup> author | Chao          | Peng        | N/A                              |
| 12 <sup>th</sup> author | Yichuan(CA)   | Xiao(CA)    | 0000-0001-7804-6971              |

**Section 3: Please provide a justification for change. Please use this section to explain your reasons for changing the authorship of your manuscript, e.g. what necessitated the change in authorship? Please refer to the (journal) policy pages for more information about authorship. Please explain why omitted authors were not originally included and/or why authors were removed on the submitted manuscript.**

In the process of revising the manuscript, Q.C. supervised a specific subset of the experiments and analyses, performed review and revision of the manuscript, so we added Q.C. as Corresponding Author;  
Z.W. performed analysis and interpretation of data; W.L. and J.Q. provided technical and material support. So, we added Z.W. W.L. and J.Q. in the list. All authors read and approved the final paper.

**Section 4: Proposed new authorship. Please provide your new authorship list in the order you would like it to appear on the manuscript. Please indicate the corresponding author by adding (CA) behind the name. If the Corresponding Author has changed, please indicate the reason under section 3.**

|                         | First name(s) | Family name (this name will appear in full on the final publication and will be searchable in various abstract and indexing databases) | Affiliated institute                                                    | E-mail address              |
|-------------------------|---------------|----------------------------------------------------------------------------------------------------------------------------------------|-------------------------------------------------------------------------|-----------------------------|
| 1 <sup>st</sup> author  | Jia           | Yuan                                                                                                                                   | Sir Run Run Shaw Hospital<br>Shanghai Institute of Nutrition and Health | yuanjia2019@sibs.ac.cn      |
| 2 <sup>nd</sup> author  | Qingchen      | Zhu                                                                                                                                    | Shanghai Institute of Nutrition and Health                              | zhuqc@sibs.ac.cn            |
| 3 <sup>rd</sup> author  | Xingli        | Zhang                                                                                                                                  | Shanghai Institute of Nutrition and Health                              | zhangxingli@sibs.ac.cn      |
| 4 <sup>th</sup> author  | Zhenzhen      | Wen                                                                                                                                    | Sir Run Run Shaw Hospital                                               | 3315019@zju.edu.cn          |
| 5 <sup>th</sup> author  | Guiheng       | Zhang                                                                                                                                  | Shanghai Institute of Nutrition and Health                              | zhangguiheng2020@sibs.ac.cn |
| 6 <sup>th</sup> author  | Ni            | Li                                                                                                                                     | Shanghai Institute of Nutrition and Health                              | lini@sibs.ac.cn             |
| 7 <sup>th</sup> author  | Yifei         | Pei                                                                                                                                    | Shanghai Institute of Nutrition and Health                              | peiyifei2017@sibs.ac.cn     |
| 8 <sup>th</sup> author  | Yan           | Wang                                                                                                                                   | Shanghai Institute of Nutrition and Health                              | yan_wang9210@126.com        |
| 9 <sup>th</sup> author  | Siyu          | Pei                                                                                                                                    | Shanghai Institute of Nutrition and Health<br>Shanghai Chest Hospital   | sypei@sibs.ac.cn            |
| 10 <sup>th</sup> author | Jing          | Xu                                                                                                                                     | Shanghai Institute of Nutrition and Health                              | xujing01@sibs.ac.cn         |
| 11 <sup>th</sup> author | Pan           | Jia                                                                                                                                    | Shanghai Institute of Nutrition and Health                              | jiapan@sibs.ac.cn           |
| 12 <sup>th</sup> author | Chao          | Peng                                                                                                                                   | National Facility for Protein Science in Shanghai                       | chaopeng@sibcb.ac.cn        |
| 13 <sup>th</sup> author | Wei           | Lu                                                                                                                                     | Shanghai Institute of Nutrition and Health                              | lvwei@sibs.ac.cn            |
| 14 <sup>th</sup> author | Jun           | Qin                                                                                                                                    | Shanghai Institute of Nutrition and Health                              | qinjun@sibs.ac.cn           |
| 15 <sup>th</sup> author | Qian(CA)      | Cao(CA)                                                                                                                                | Sir Run Run Shaw Hospital                                               | caoq@zju.edu.cn             |
| 16 <sup>th</sup> author | Yichuan(CA)   | Xiao(CA)                                                                                                                               | Shanghai Institute of Nutrition and Health                              | ycxiao@sibs.ac.cn           |

**Section 5: Author contribution, Acknowledgement and Disclosures.** Please use this section to provide a new disclosure statement and, if appropriate, acknowledge any contributors who have been removed as authors and ensure you state what contribution any new authors made (if applicable per the journal or book (series) policy). **Please ensure these are updated in your manuscript - after approval of the change(s) - as our production department will not transfer the information in this form to your manuscript.**

**New acknowledgements:**

We thank Drs. Mian Wu and Pengfei Zhang (University of Science and Technology of China, China) for the generous gift of Neat1-KO mice and Neat1 expression plasmid, and Dr. Jiawei Zhou (Chinese Academy of Sciences, China) for the assistance to generate 6-OHDA-induced PD-like mouse model.

**New Disclosures (financial and non-financial interests, funding):**

The authors declare no competing interests. This research was supported by the grants from the National Natural Science Foundation of China (82030041, 82001657), the Strategic Priority Research Program of the Chinese Academy of Sciences (XDB39030300), the National Key R&D Program of China (2018YFA0107201, 2018YFA0902703), the programs from Shanghai Municipal Science and Technology (20XD1424600, 21140905000), China Postdoctoral Science Foundation (2021M702163, 2021M700160, 2021M693272), Special Research Assistant Funding Project of the Chinese Academy of Sciences (Q.Z.), Shanghai Post-doctoral Excellence Program (2021438 for Q.Z.) and CAS Key Laboratory of Tissue Microenvironment and Tumor.

**New Author Contributions statement (if applicable per the journal policy):**

J.Y. and Q.Z. designed and performed the experiments, prepared the figures, and wrote part of the manuscript; X.Z., Z.W., G.Z., Y.P., Y.W., S.P., and J.X. contributed to the experiments; N.L. and J.Q. contributed to ChIP-seq data analysis; P.J. and W.L. contributed to p65-knockdown Raw264.7 cells; C.P. contributed to mass spectrum analysis; Q.C. supervised a specific subset of the experiments and analyses; Y.X. initiated, designed and supervised this study, prepared the figures and wrote the manuscript. All authors read and approved the final paper.

State 'Not applicable' if there are no new authors.

**Section 6: Declaration of agreement. All authors, unchanged, new and removed *must* sign this declaration.**

(NB: Please print the form, (docu)-sign and return/upload a scanned copy. Please note that signatures that have been inserted as an image file are acceptable as long as it is handwritten. Typed names in the signature box are unacceptable.) \* Please delete as appropriate. Delete all of the bold if you were on the original authorship list and are remaining as an author.

|                         | First name | Family name |                                                                                                                                                                               | Signature     | Date       |
|-------------------------|------------|-------------|-------------------------------------------------------------------------------------------------------------------------------------------------------------------------------|---------------|------------|
| 1 <sup>st</sup> author  | Jia        | Yuan        | I agree to the proposed new authorship shown in section 4 /and the <b>addition/removal*of my name to the authorship list</b> /and the proposed change in corresponding author | Jia Yuan      | 2022.03.21 |
| 2 <sup>nd</sup> author  | Qingchen   | Zhu         | I agree to the proposed new authorship shown in section 4 /and the <b>addition/removal*of my name to the authorship list</b> /and the proposed change in corresponding author | Qingchen Zhu  | 2022.03.21 |
| 3 <sup>rd</sup> author  | Xingli     | Zhang       | I agree to the proposed new authorship shown in section 4 /and the <b>addition/removal*of my name to the authorship list</b> /and the proposed change in corresponding author | Xingli Zhang  | 2022.03.21 |
| 4 <sup>th</sup> authors | Zhenzhen   | Wen         | I agree to the proposed new authorship shown in section 4 /and the <b>addition/removal*of my name to the authorship list</b> /and the proposed change in corresponding author | Zhenzhen Wen  | 2022.03.21 |
| 5 <sup>th</sup> author  | Guiheng    | Zhang       | I agree to the proposed new authorship shown in section 4 /and the <b>addition/removal*of my name to the authorship list</b> /and the proposed change in corresponding author | Guiheng Zhang | 2022.03.21 |
| 6 <sup>th</sup> author  | Ni         | Li          | I agree to the proposed new authorship shown in section 4 /and the <b>addition/removal*of my name to the authorship list</b> /and the proposed change in corresponding author | Ni Li         | 2022.03.21 |
| 7 <sup>th</sup> author  | Yifei      | Pei         | I agree to the proposed new authorship shown in section 4 /and the <b>addition/removal*of my name to the authorship list</b> /and the proposed change in corresponding author | Yifei Pei     | 2022.03.21 |

|                         | First name | Family name |                                                                                                                                                                               | Signature | Date       |
|-------------------------|------------|-------------|-------------------------------------------------------------------------------------------------------------------------------------------------------------------------------|-----------|------------|
| 8 <sup>th</sup> author  | Yan        | Wang        | I agree to the proposed new authorship shown in section 4 /and the <b>addition/removal*of my name to the authorship list</b> /and the proposed change in corresponding author | Yan Wang  | 2022.03.21 |
| 9 <sup>th</sup> author  | Siyu       | Pei         | I agree to the proposed new authorship shown in section 4 /and the <b>addition/removal*of my name to the authorship list</b> /and the proposed change in corresponding author | Siyu Pei  | 2022.03.21 |
| 10 <sup>th</sup> author | Jing       | Xu          | I agree to the proposed new authorship shown in section 4 /and the <b>addition/removal*of my name to the authorship list</b> /and the proposed change in corresponding author | Jing Xu   | 2022.03.21 |

Please use an additional sheet if there are more than 10 authors.

|                         |      |      |                                                                                                                                                                               |           |            |
|-------------------------|------|------|-------------------------------------------------------------------------------------------------------------------------------------------------------------------------------|-----------|------------|
| 11 <sup>th</sup> author | Pan  | Jia  | I agree to the proposed new authorship shown in section 4 /and the <b>addition/removal*of my name to the authorship list</b> /and the proposed change in corresponding author | Pan Jia   | 2022.03.21 |
| 12 <sup>th</sup> author | Chao | Peng | I agree to the proposed new authorship shown in section 4 /and the <b>addition/removal*of my name to the authorship list</b> /and the proposed change in corresponding author | Chao Peng | 2022.03.21 |
| 13 <sup>th</sup> author | Wei  | Lu   | I agree to the proposed new authorship shown in section 4 /and the <b>addition/removal*of my name to the authorship list</b> /and the proposed change in corresponding author | Wei Lu    | 2022.03.21 |

|                         | First name | Family name |                                                                                                                                                                               | Signature           | Date       |
|-------------------------|------------|-------------|-------------------------------------------------------------------------------------------------------------------------------------------------------------------------------|---------------------|------------|
| 14 <sup>th</sup> author | Jun        | Qin         | I agree to the proposed new authorship shown in section 4 /and the <b>addition/removal*of my name to the authorship list</b> /and the proposed change in corresponding author | <i>Jun Qin</i>      | 2022.03.21 |
| 15 <sup>th</sup> author | Qian       | Cao         | I agree to the proposed new authorship shown in section 4 /and the <b>addition/removal*of my name to the authorship list</b> /and the proposed change in corresponding author | <i>Qian Cao</i>     | 2022.03.21 |
| 16 <sup>th</sup> author | Yichuan    | Xiao        | I agree to the proposed new authorship shown in section 4 /and the <b>addition/removal*of my name to the authorship list</b> /and the proposed change in corresponding author | <i>yichuan Xiao</i> | 2022.03.21 |

**In case of author collaborations with formal agreement:**

|                                | Name of consortium/consortia | First name | Family name |                                                                                                                                                                               | Signature | Date |
|--------------------------------|------------------------------|------------|-------------|-------------------------------------------------------------------------------------------------------------------------------------------------------------------------------|-----------|------|
| Representative/legal guarantor |                              |            |             | I agree to the proposed new authorship shown in section 4 /and the <b>addition/removal*of my name to the authorship list</b> /and the proposed change in corresponding author |           |      |

Both added/removed authors should complete the information in the first table under Section 6.

---- End of form ----
