# Supplementary material
Source: PubMed Central journal article supplement (PMC9525607)

Figure 1

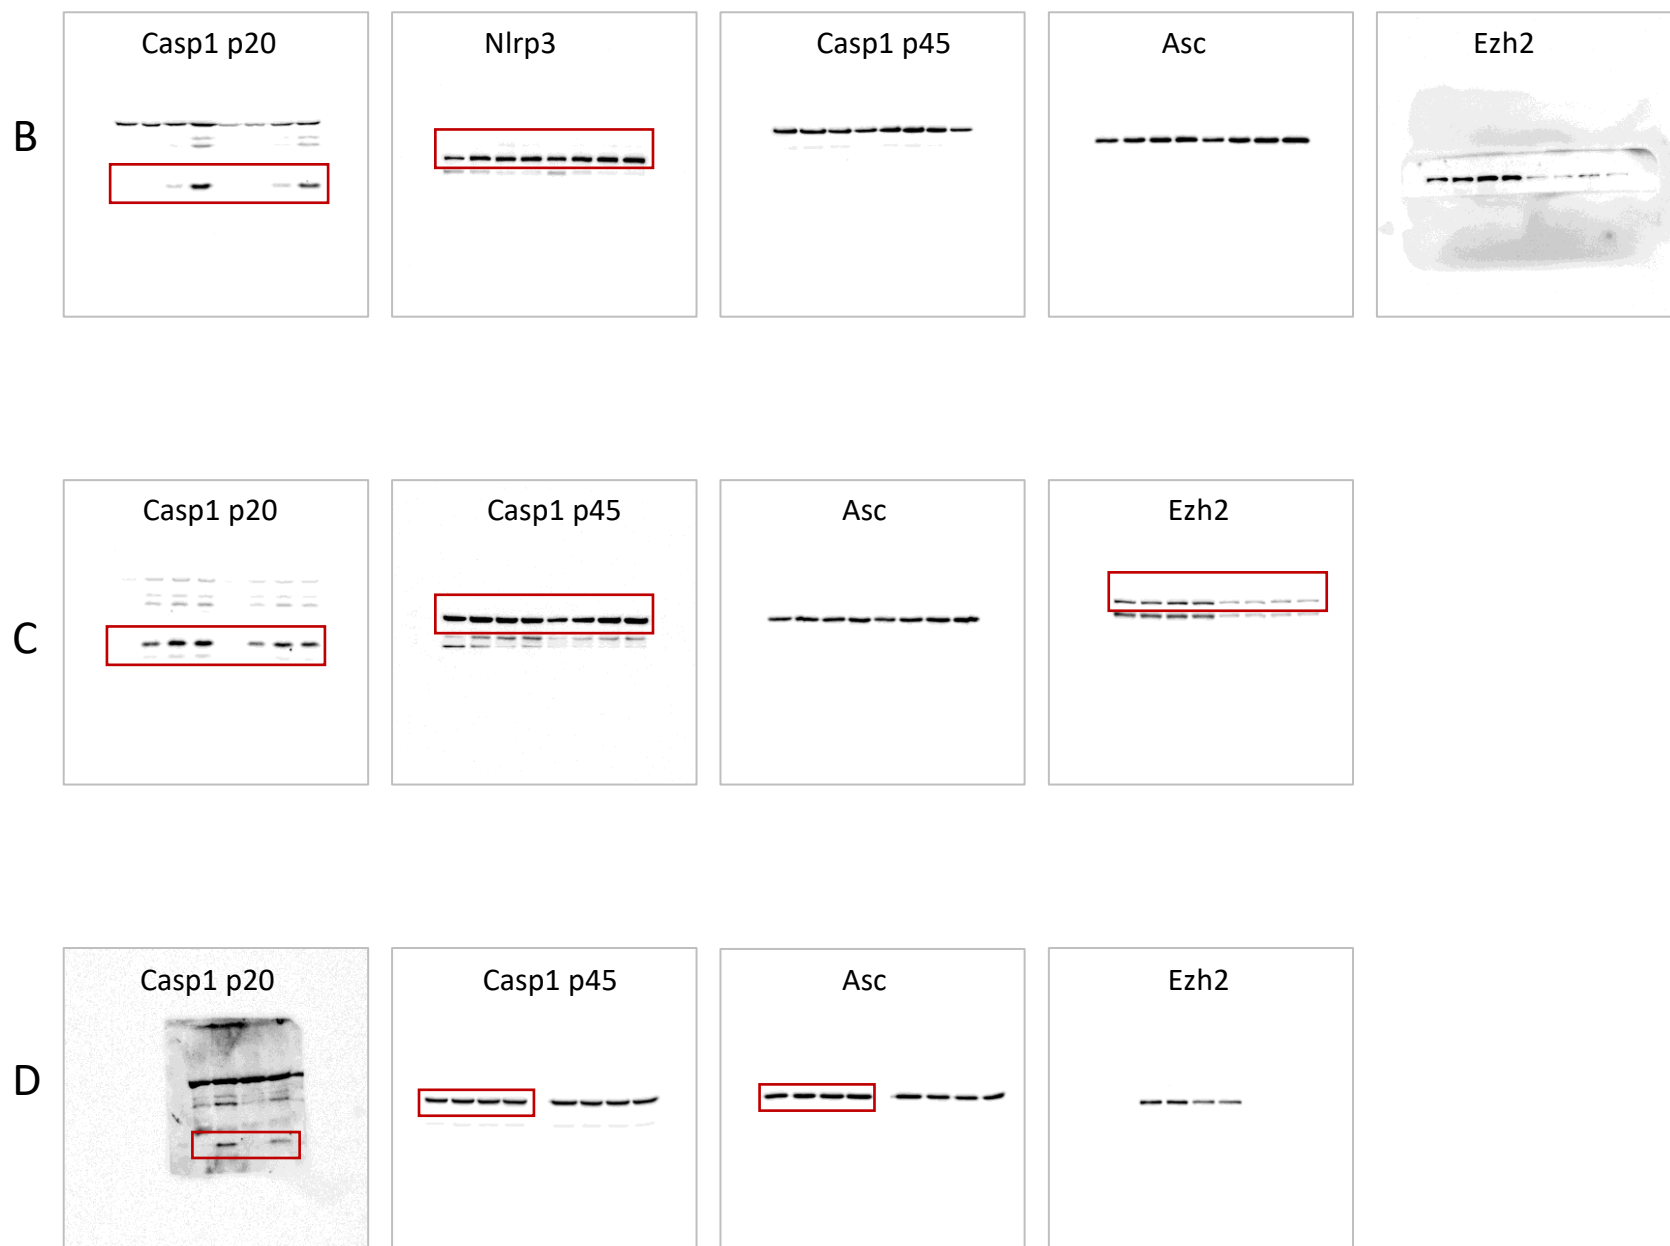

Figure 2

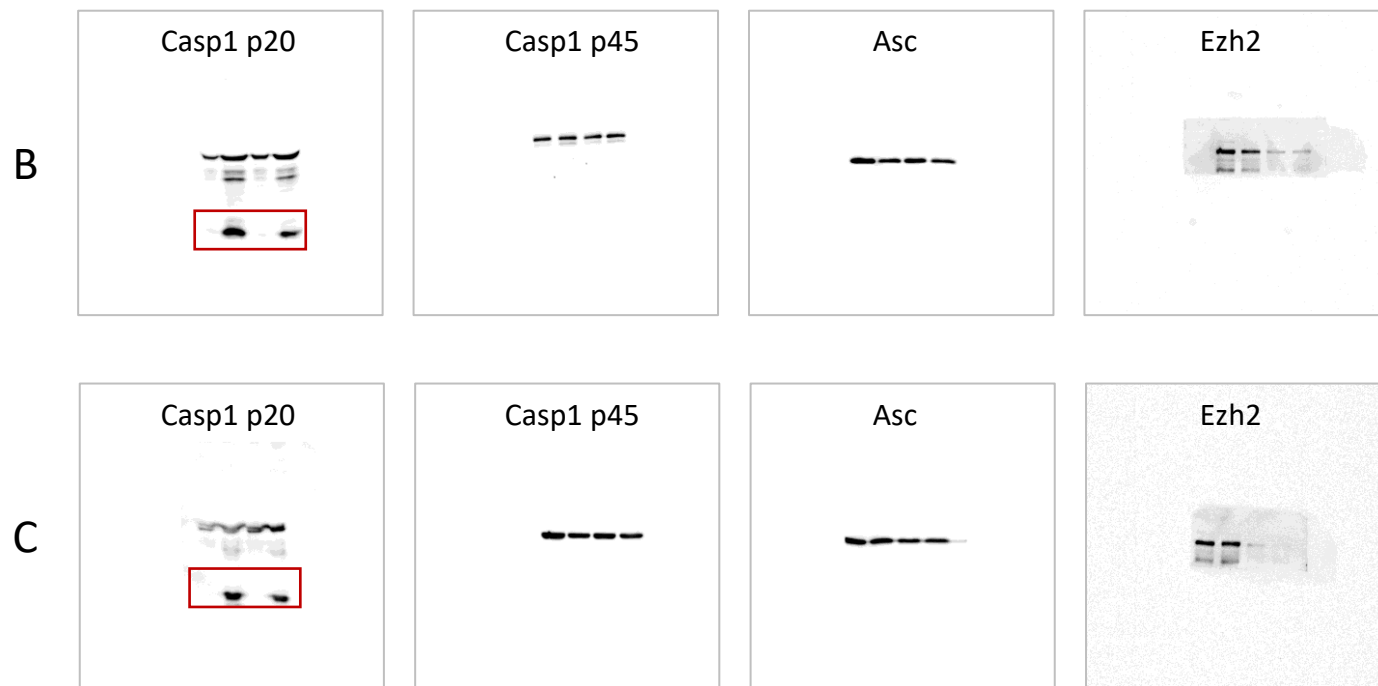

Figure 3

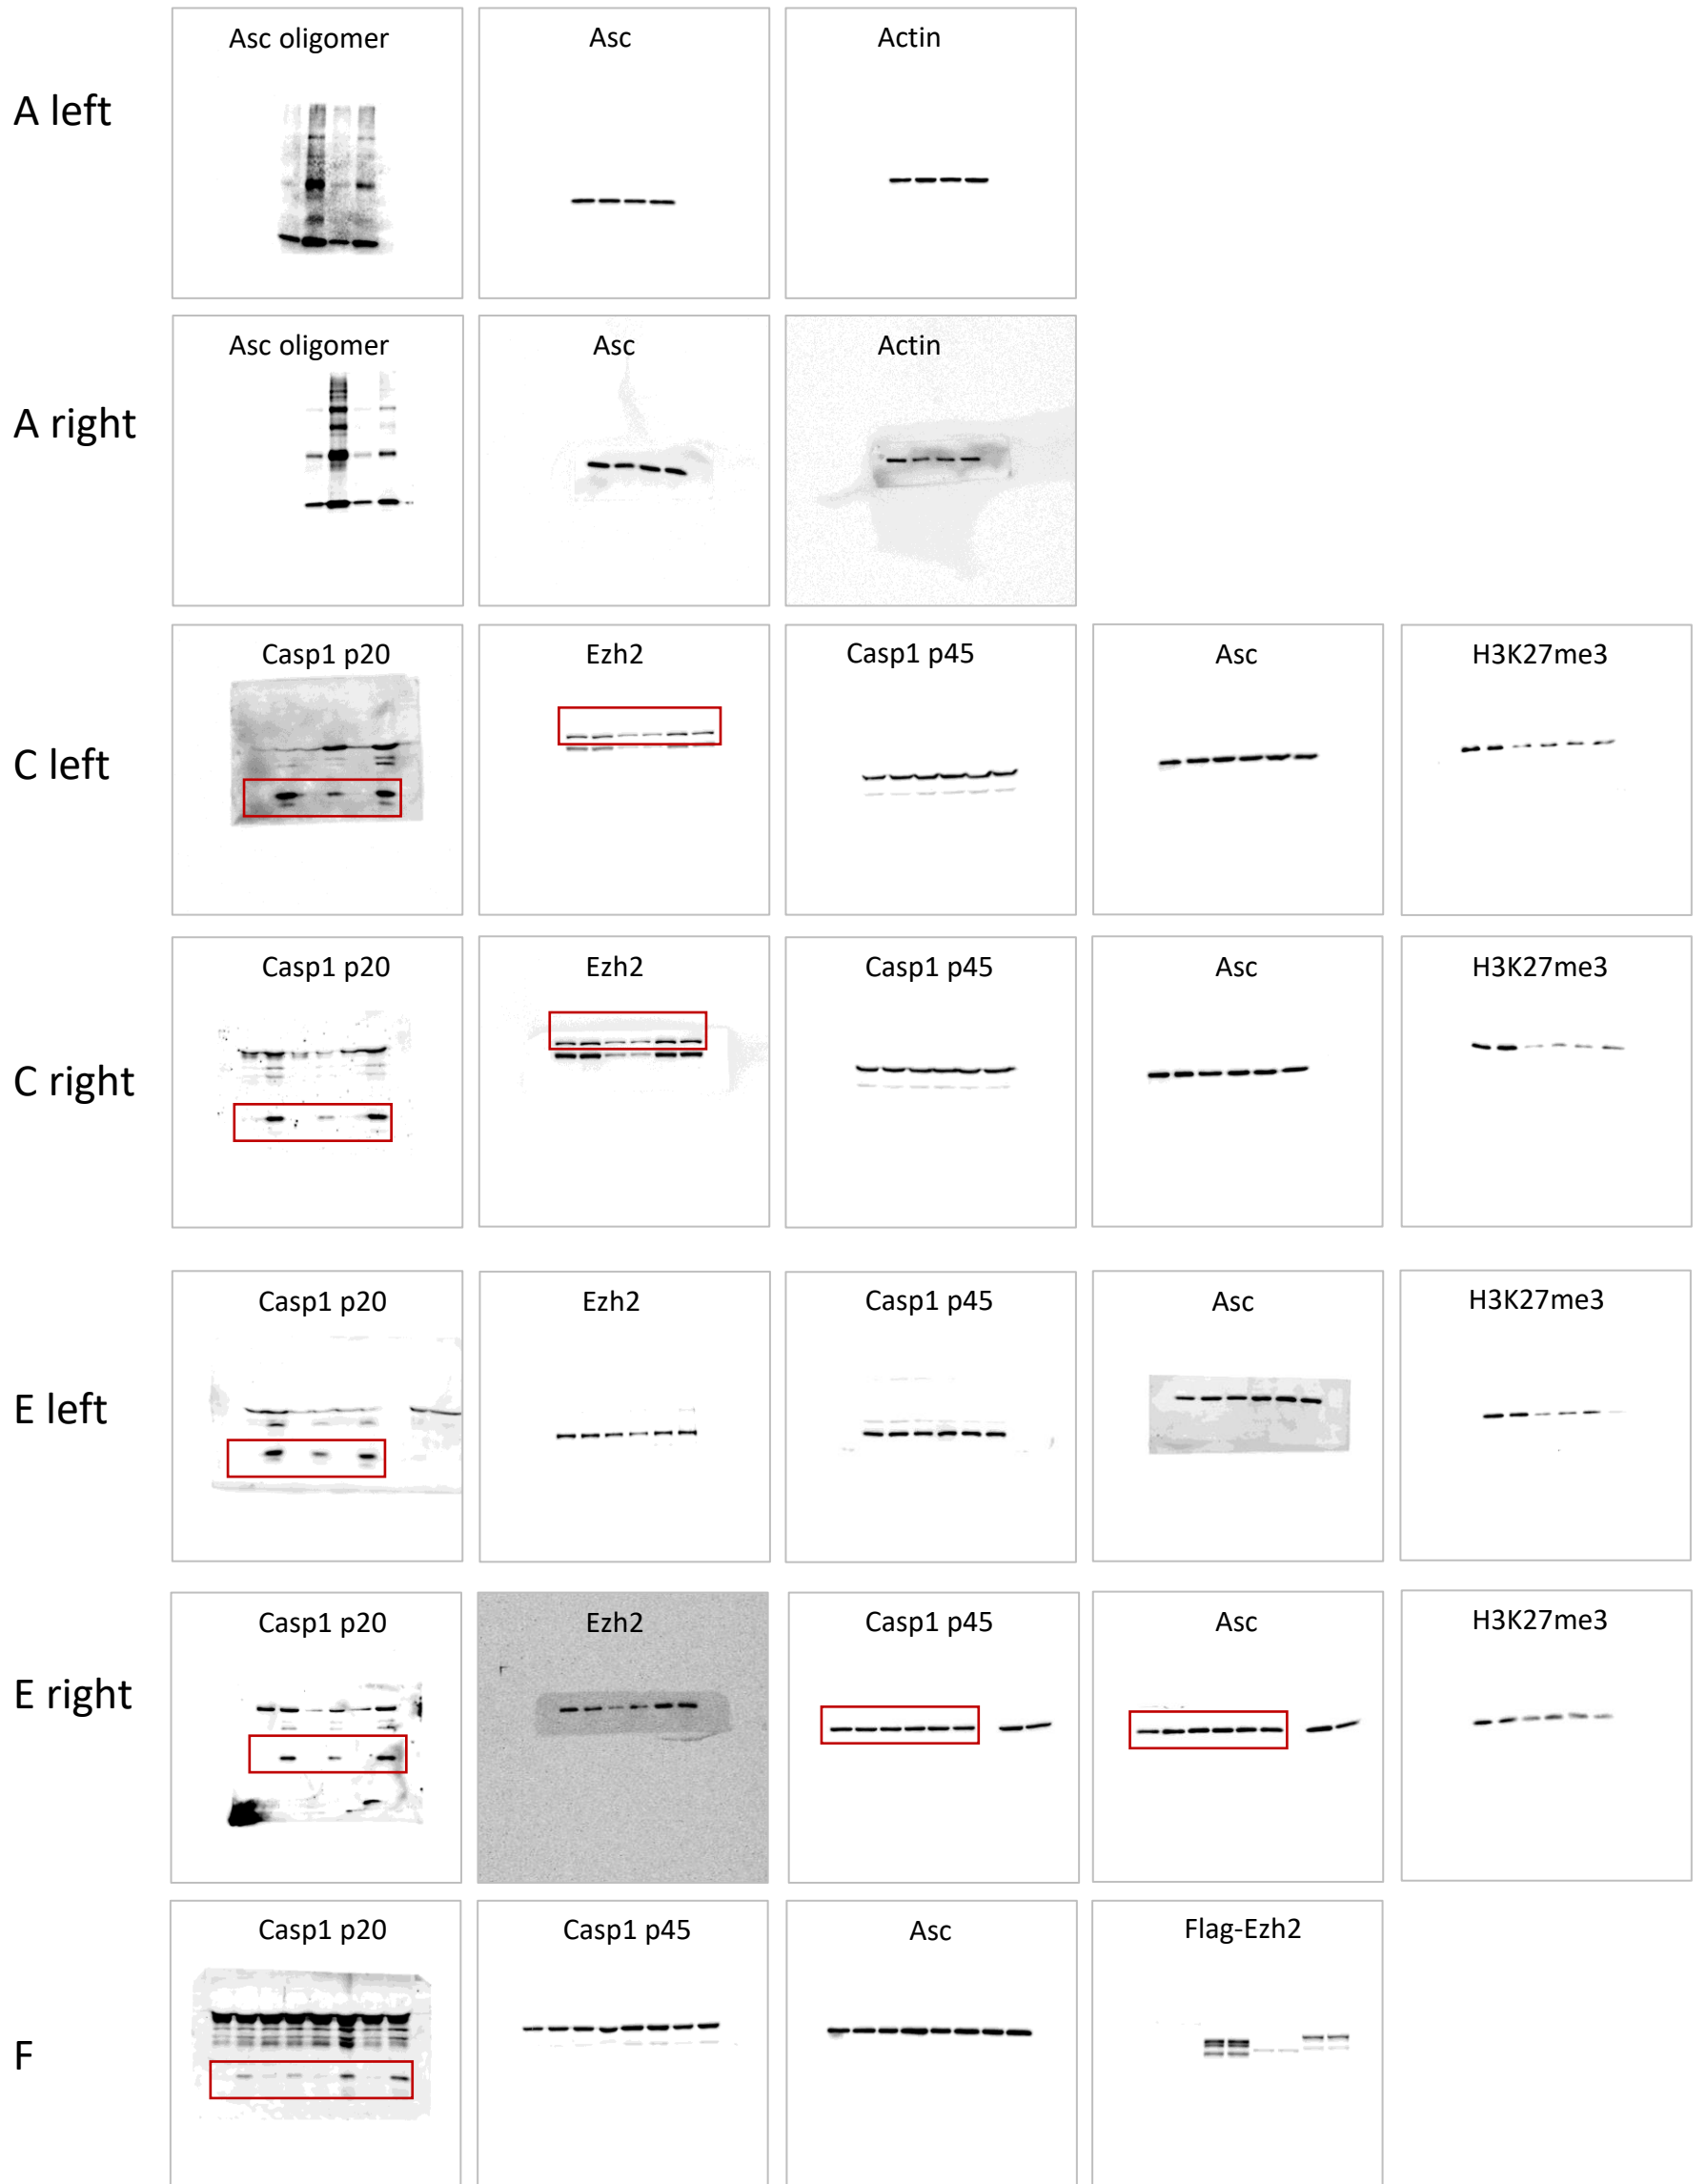

Figure 4

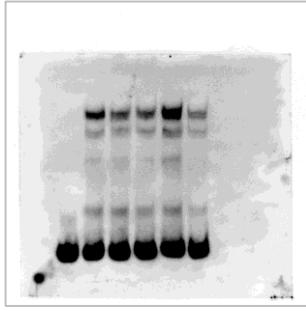

J left

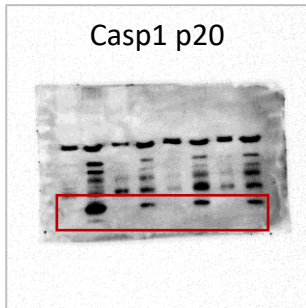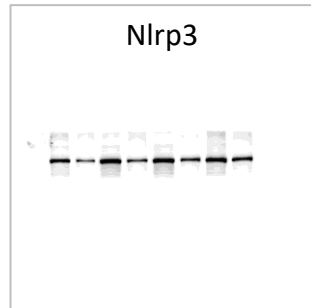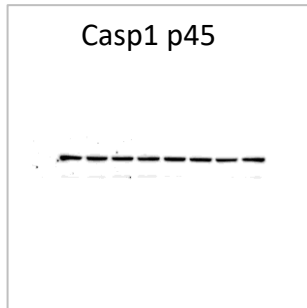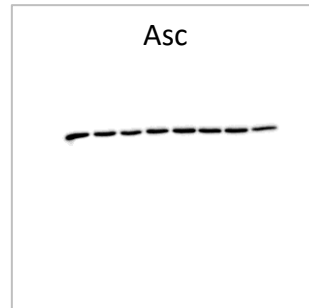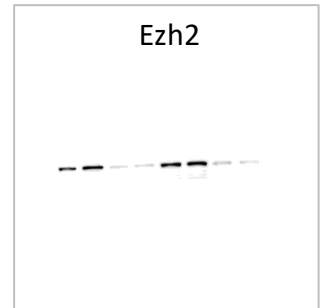

J right

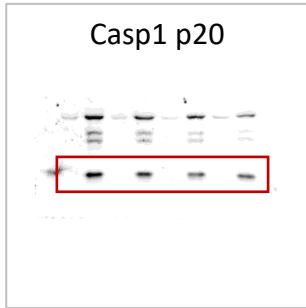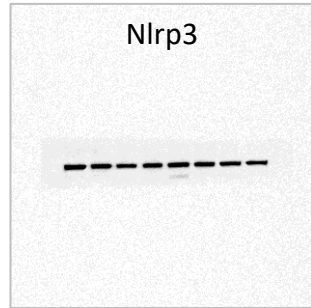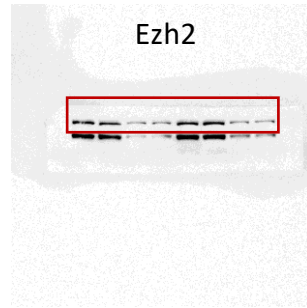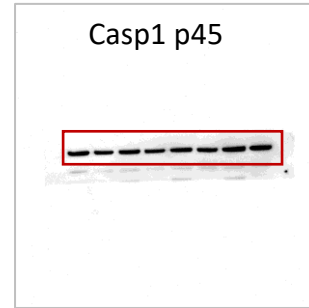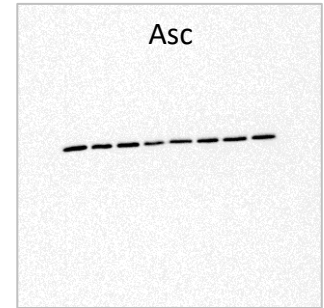

K up

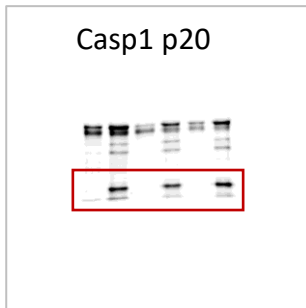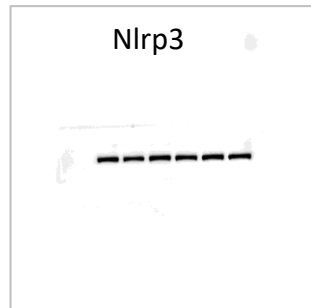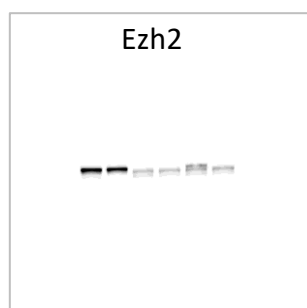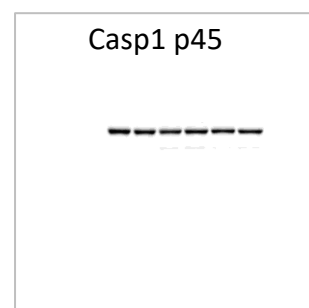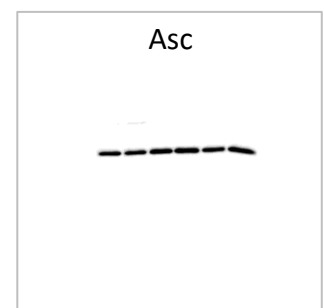

K down

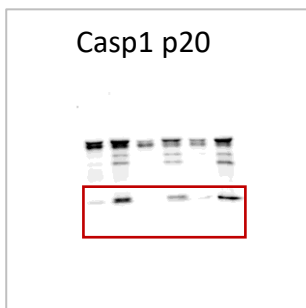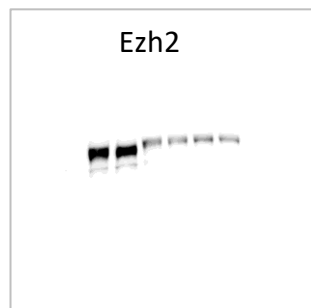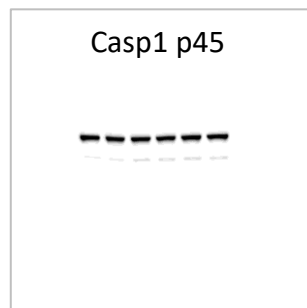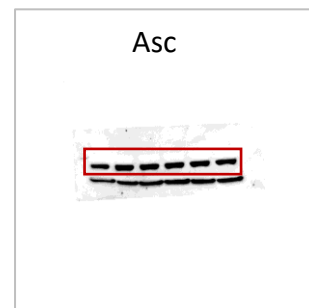

Figure 7

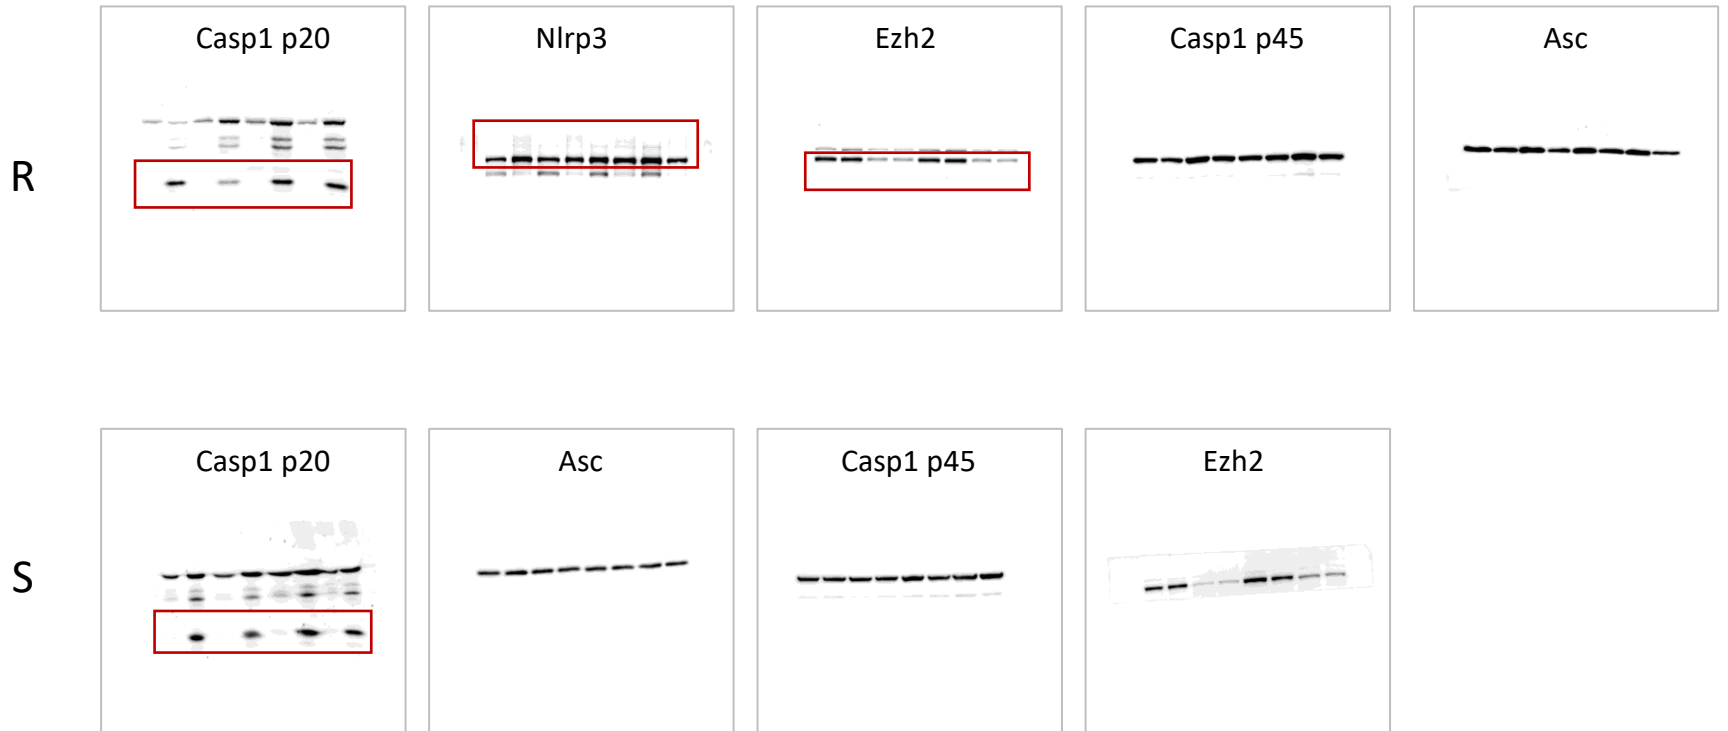

S 2

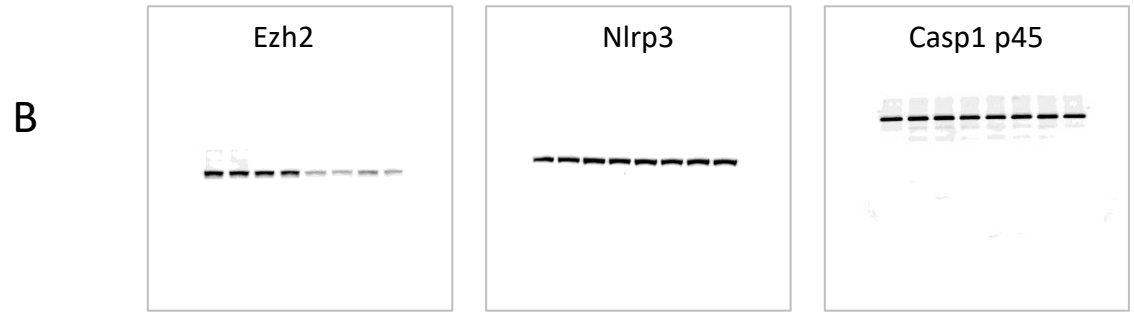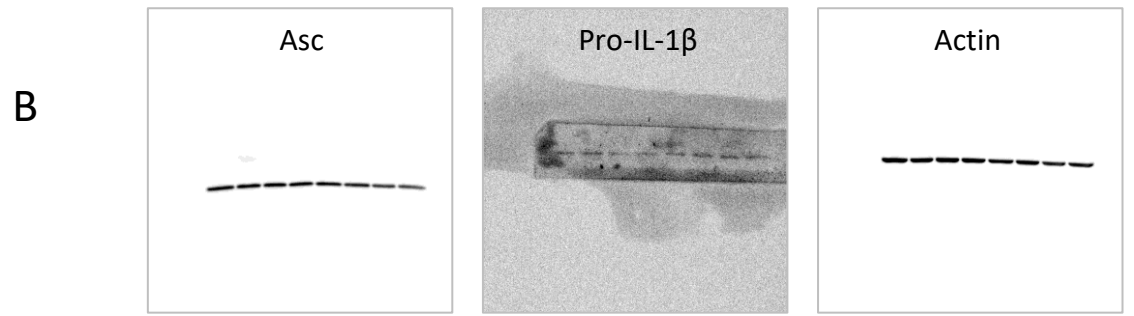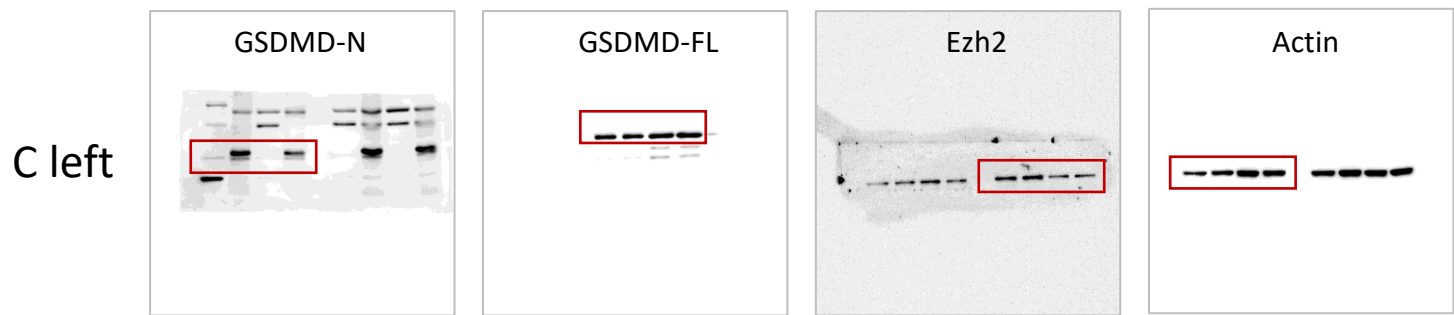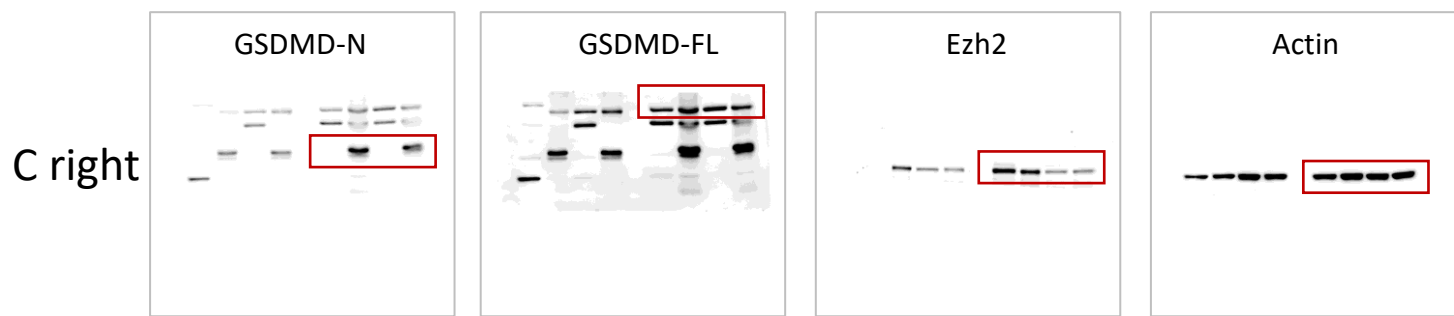

S 3

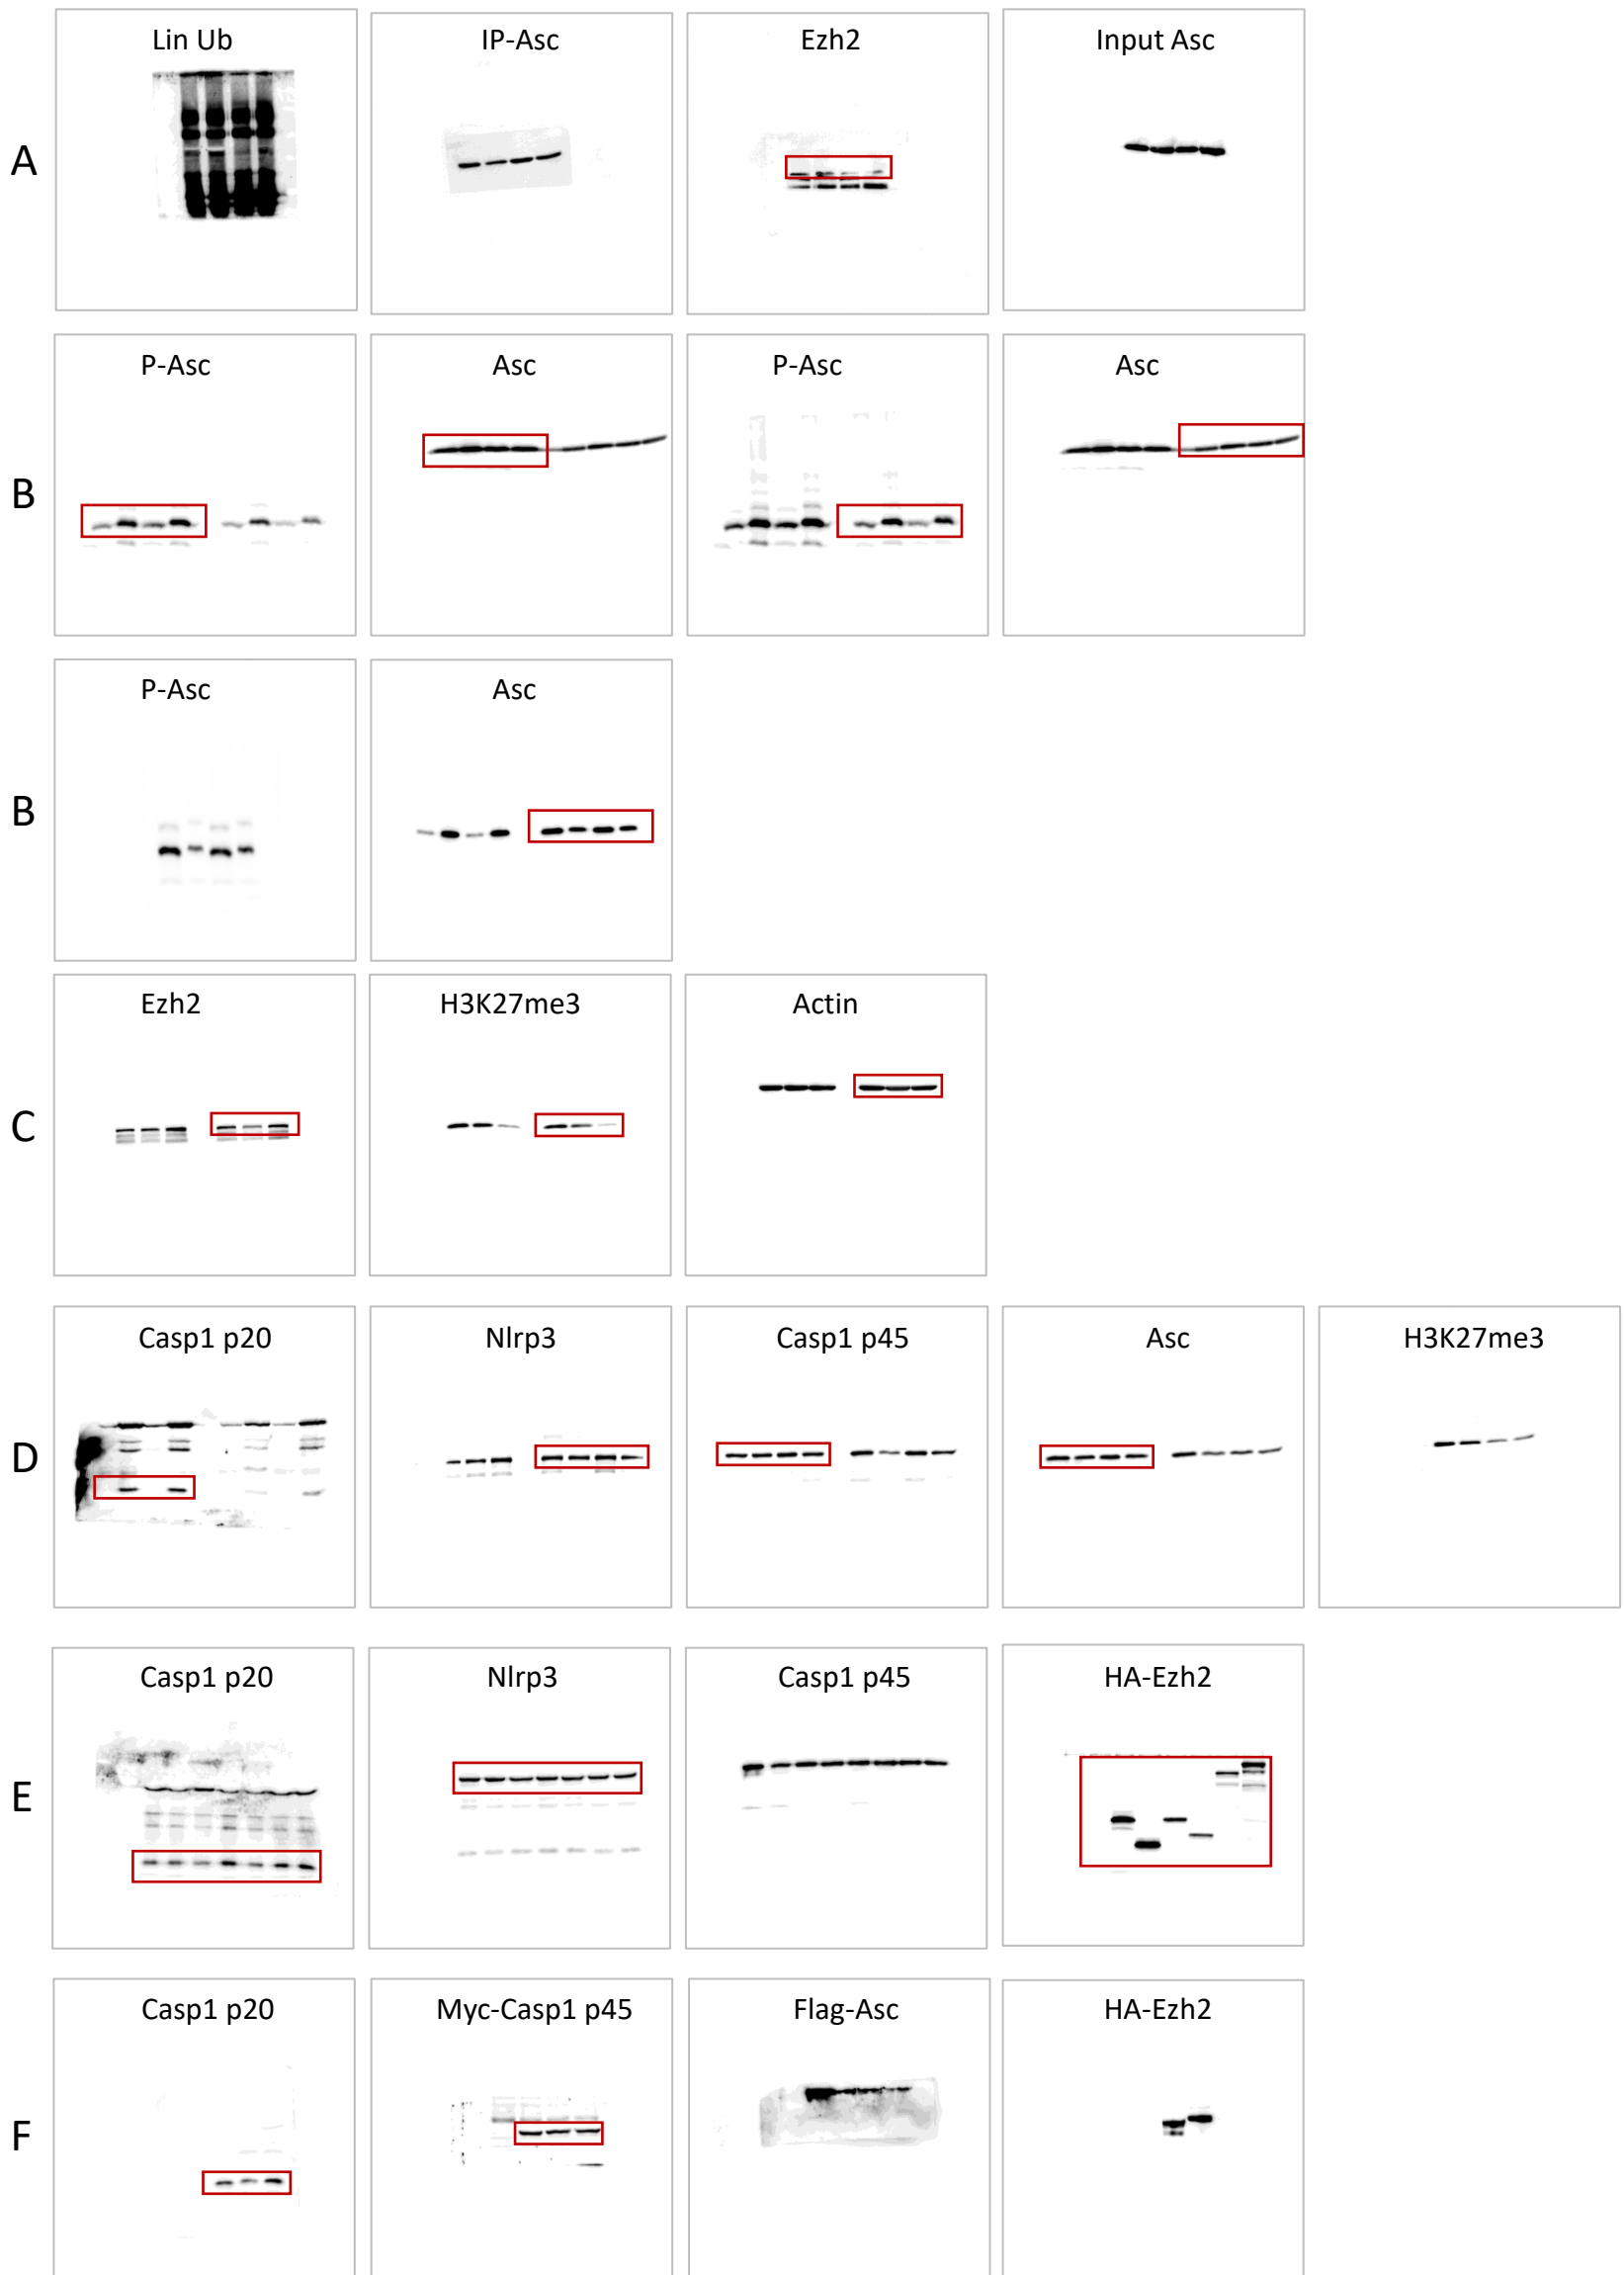

S 4

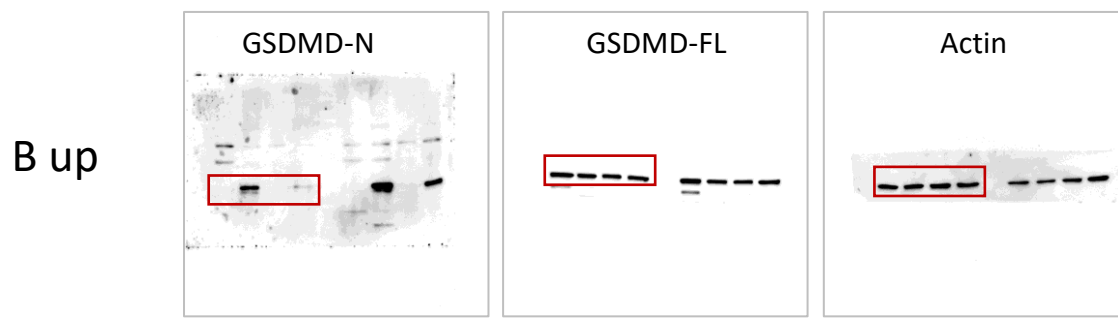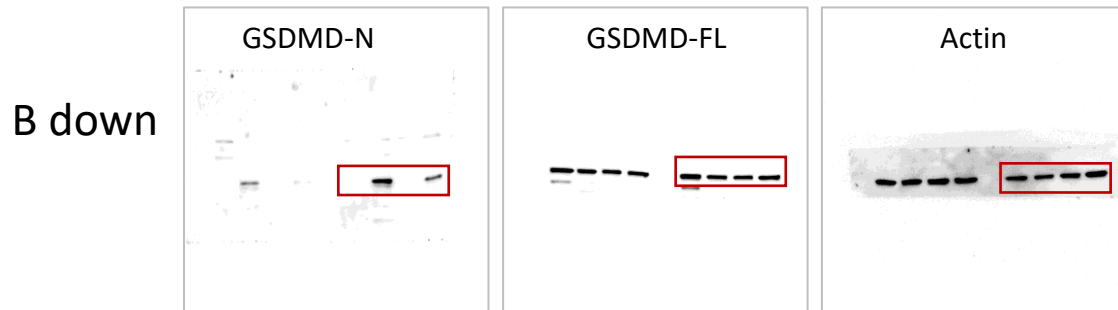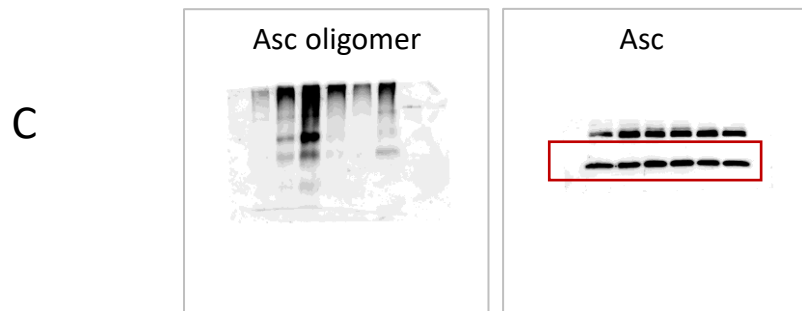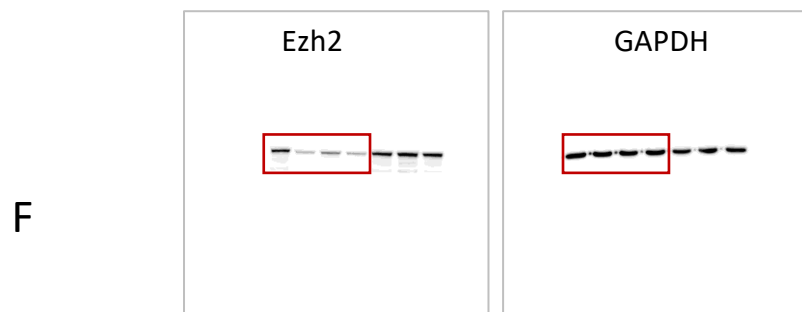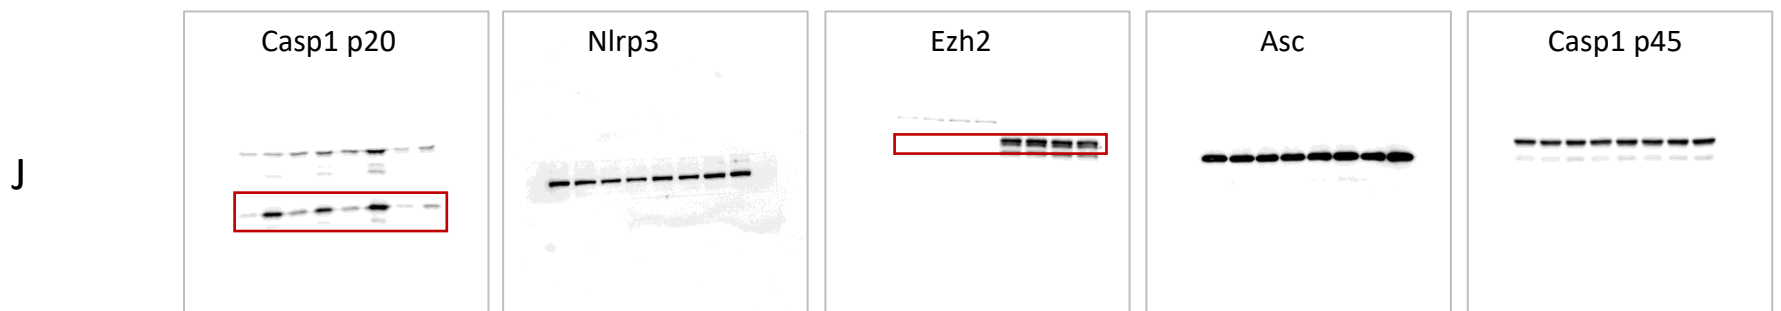



S 5

B

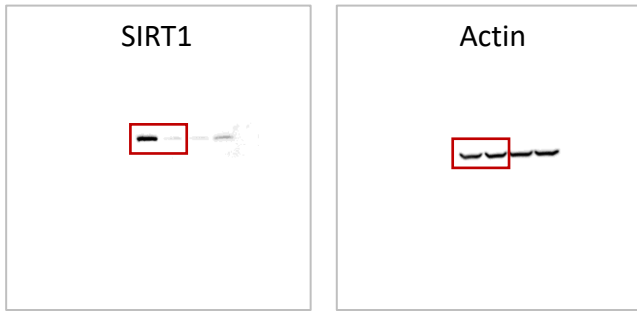

S 6

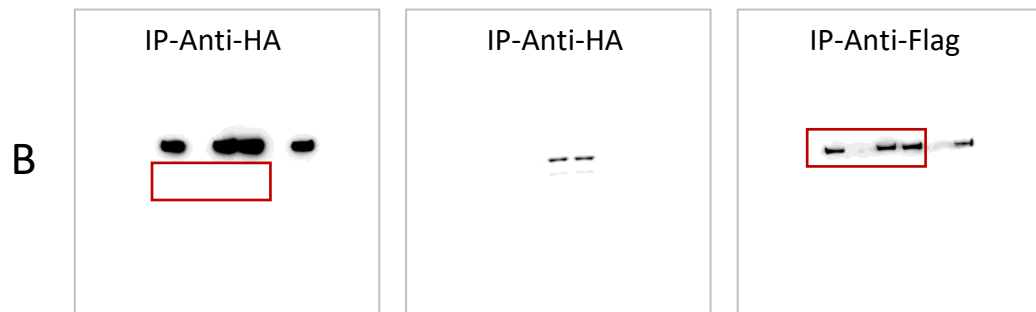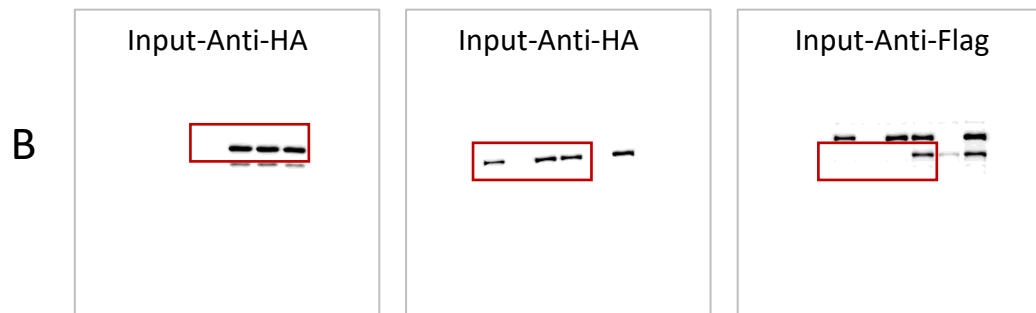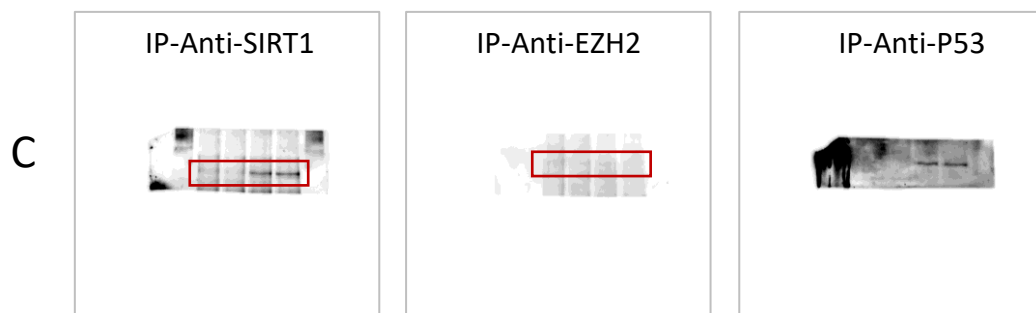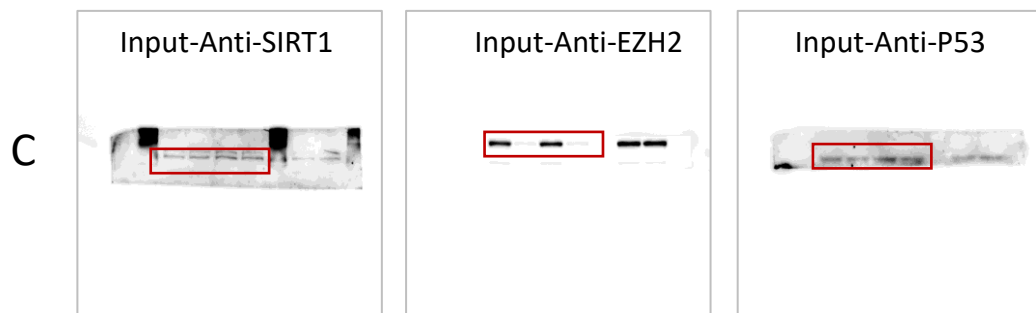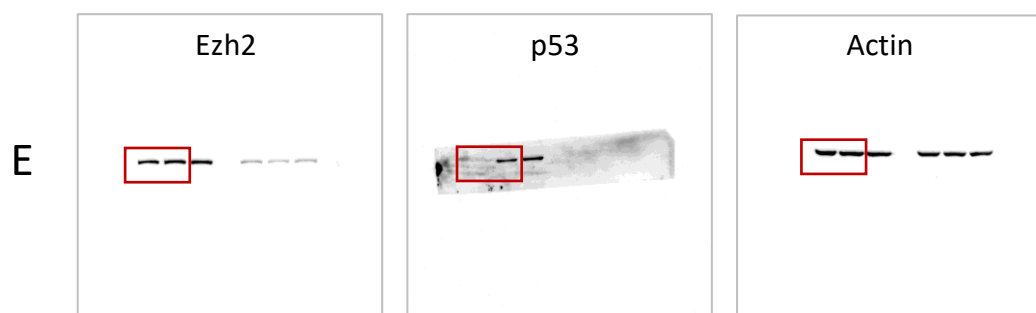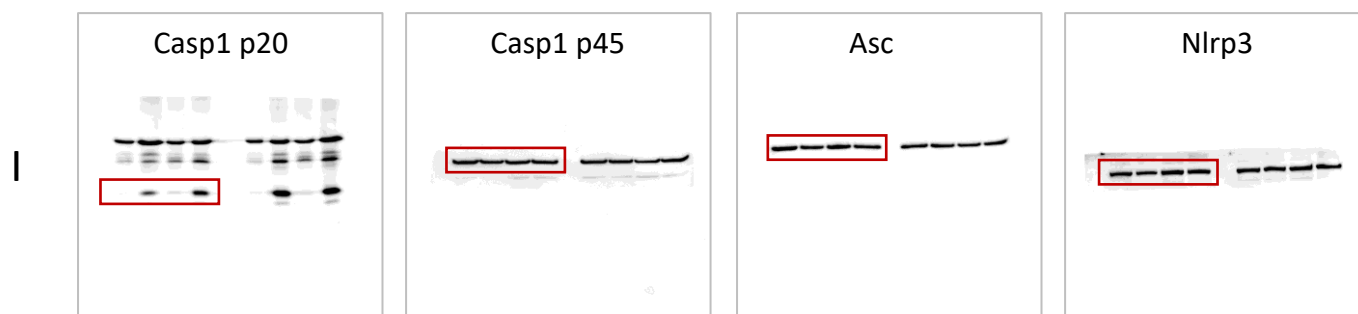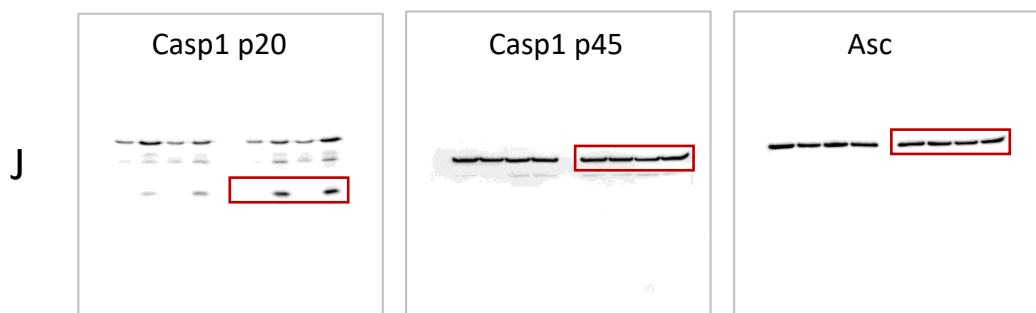

S 6

K left

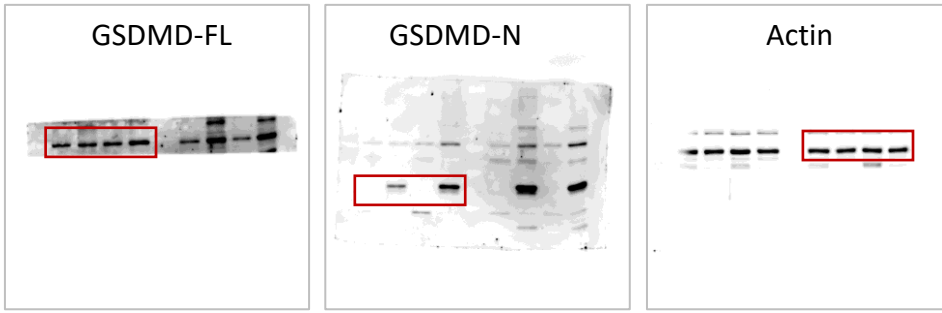

K right

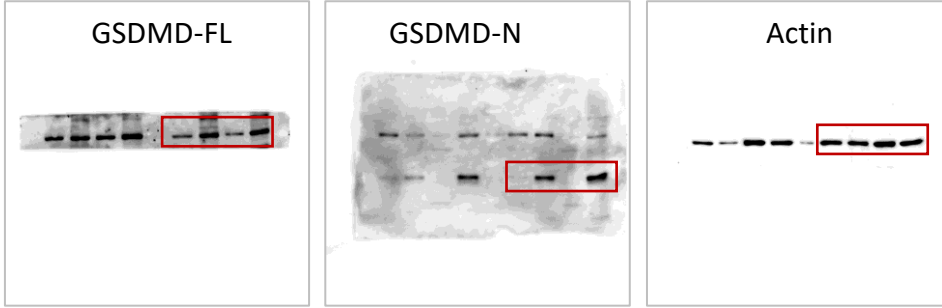

M

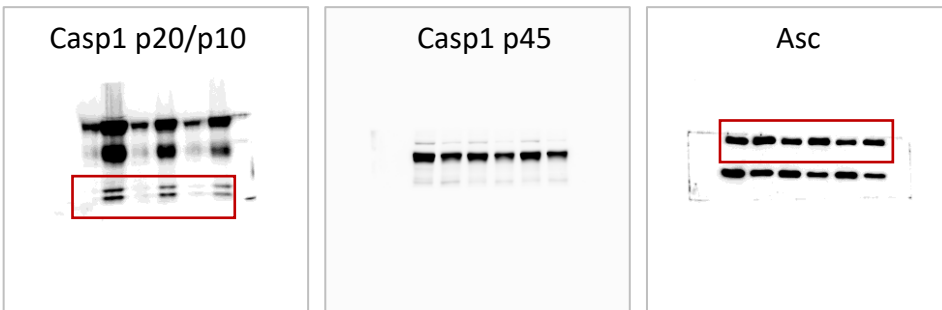

Q

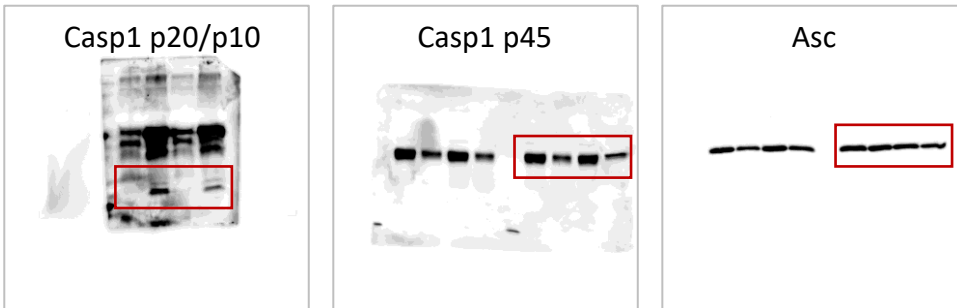

R

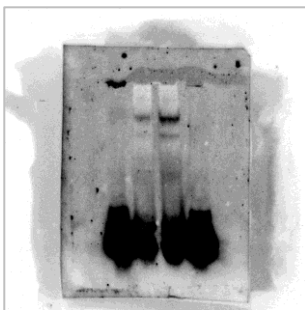

S

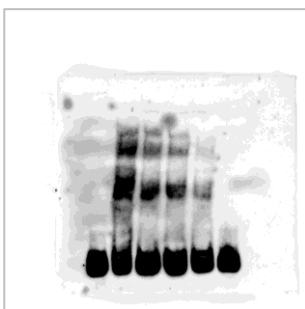

Supplement: 41418_2022_992_MOESM2_ESM.pdf [file 41418_2022_992_MOESM2_ESM.pdf]
